# Supplementary material for: Synthesis of star-shaped monodisperse oligo(9,9-di-n-octylfluorene-2,7-vinylene)s functionalized truxenes with two-photon absorption properties
Source: Royal Society of Chemistry journal article supplement (doi:10.1039/c0ob00803f), 2010-11-25
Supplement: c0ob00803f.pdf [file c0ob00803f.pdf]

## Supporting Information for:

### Synthesis of star-shaped monodisperse oligo(9,9-di-n-octylfluorene-2,7-vinylene)s functionalized truxenes with two-photon absorption properties

Huipeng Zhou,<sup>a</sup> Xin Zhao,<sup>a</sup> Tianhao, Huang,<sup>b</sup> Ran Lu,<sup>\*,a</sup> Hanzhuang  
Zhang,<sup>b</sup> Xiaohui Qi,<sup>b</sup> Pengchong Xue,<sup>a</sup> Xingliang Liu,<sup>a</sup> and Xiaofei  
Zhang<sup>a</sup>

<sup>a</sup> *State Key Laboratory of Supramolecular Structure and Materials, College of  
Chemistry, Jilin University, Changchun 130012, P. R. China.*

<sup>b</sup> *College of Physics, Jilin University, Changchun 130012, P.R.China*

*Fax: +86-431-88923907; Tel: +86-431-88499179*

*E-Mail: luran@mail.jlu.edu.cn*

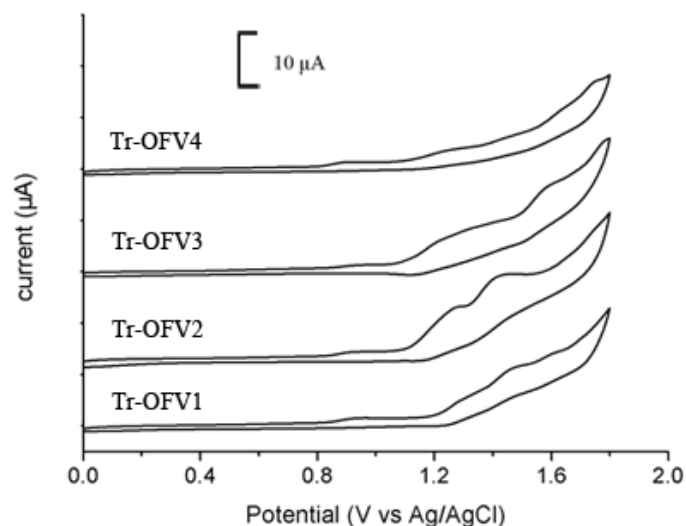

**Fig. S1** Cyclic voltammety diagrams of **Tr-OFV<sub>n</sub>** in anhydrous CH<sub>2</sub>Cl<sub>2</sub> with 0.1 M Bu<sub>4</sub>NBF<sub>4</sub> as electrolyte at a scan rate of 100 mV·s<sup>-1</sup>.

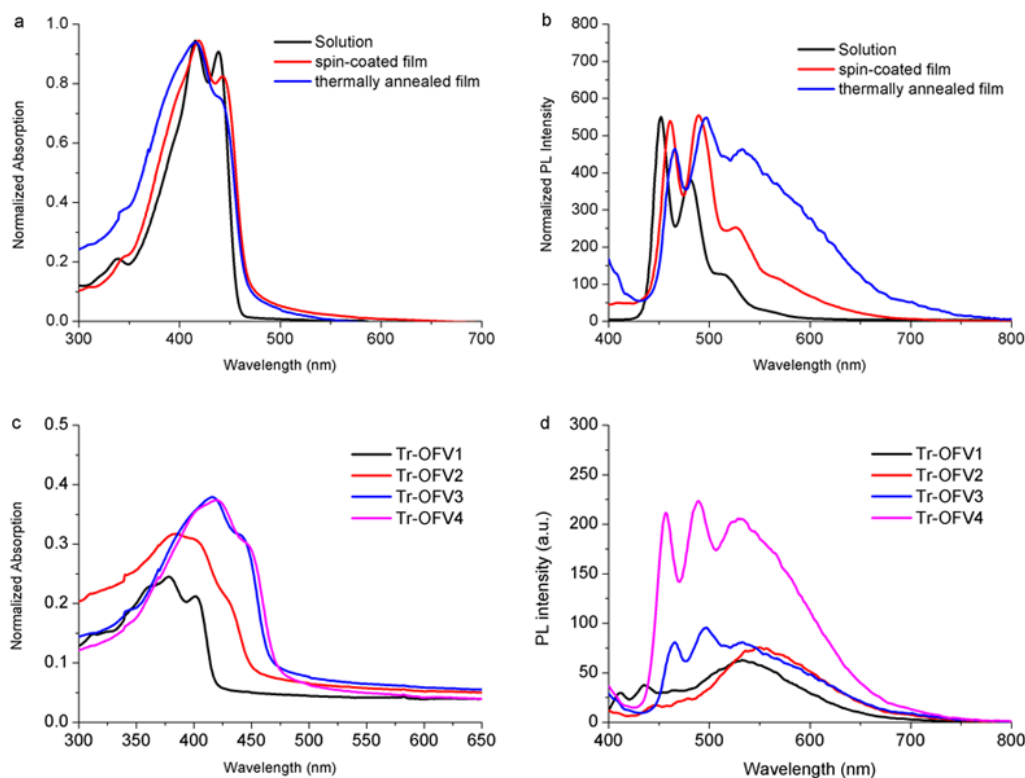

**Fig. S2** Normalized UV-vis absorption (a) and fluorescence (b,  $\lambda_{\text{ex}} = 390$  nm) spectra of **Tr-OFV3** in THF ( $2.0 \times 10^{-6}$  M), in spin-coated film and in the thermally annealed film; UV-vis absorption (c) and fluorescence spectra (d,  $\lambda_{\text{ex}} = 365$  nm) of **Tr-OFV<sub>n</sub>** in the themally annealed films.

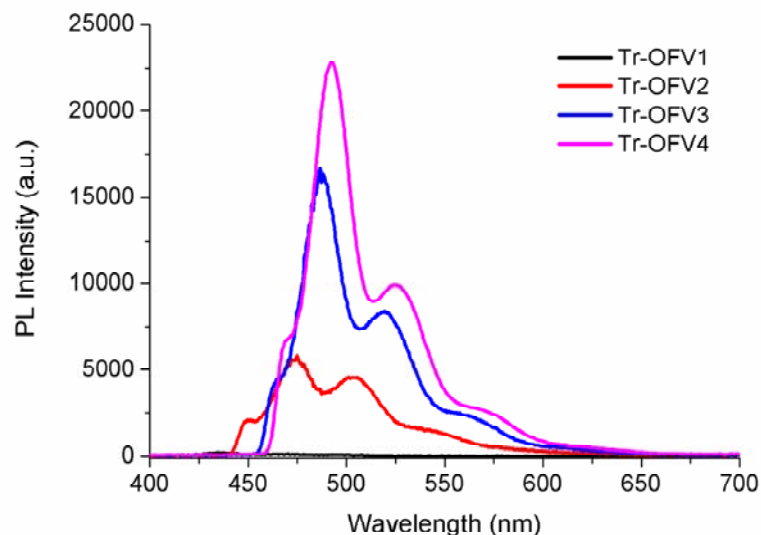

**Fig. S3** Two-photon-induced fluorescence spectra ( $\lambda_{\text{ex}} = 710 \text{ nm}$ ) of **Tr-OFV $n$**  in toluene ( $5.0 \times 10^{-5} \text{ M}$ ).

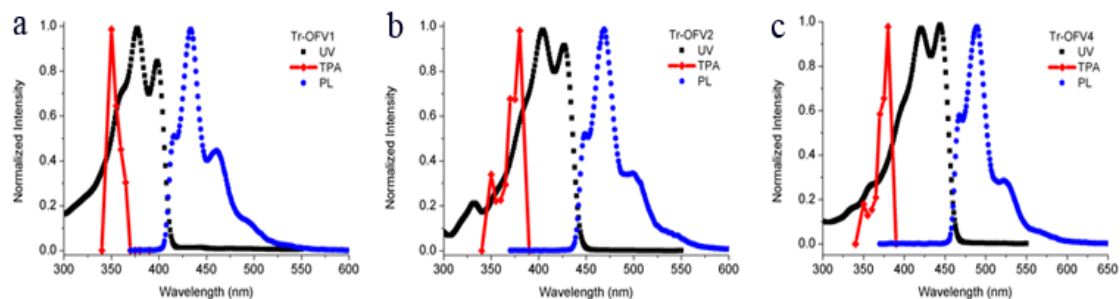

**Fig. S4** Normalized one-photon absorption (black), single-photon excitation fluorescence spectra (blue,  $\lambda_{\text{ex}} = 365 \text{ nm}$ ) and two-photon excitation spectra (red) for **Tr-OFV1** (a), **Tr-OFV2** (b) and **Tr-OFV4** (c) in toluene ( $5.0 \times 10^{-5} \text{ M}$ ). The two-photon spectra are plotted against  $\lambda/2$  (twice the photon energy).

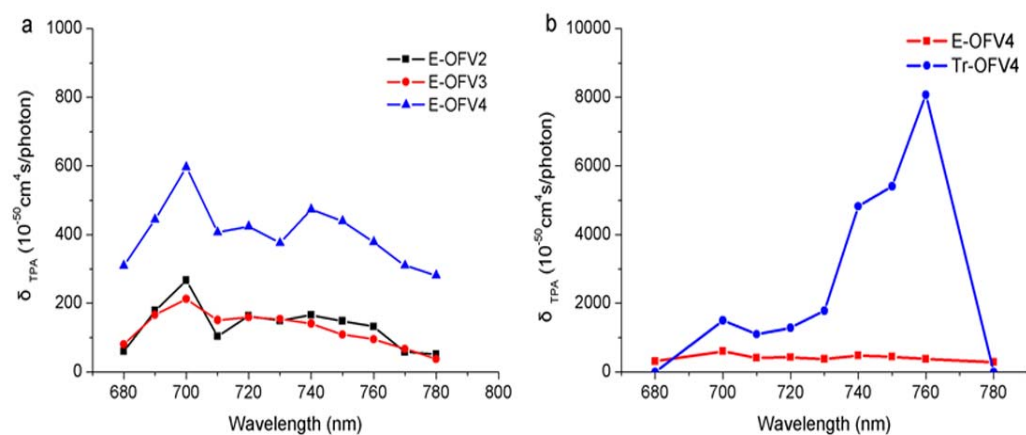

**Fig. S5** (a) The two-photon excitation spectra of **E-OFV<sub>n</sub>** ( $n = 2, 3, 4$ ) in toluene ( $1.5 \times 10^{-4}$  M); (b) The two-photon excitation spectra of **E-OFV4** ( $1.5 \times 10^{-4}$  M) and **Tr-OFV4** ( $5.0 \times 10^{-5}$  M) in toluene. The max two-photon cross sections were 260 GM, 215 GM and 597 GM for **E-OFV2**, **E-OFV3** and **E-OFV4**, respectively.

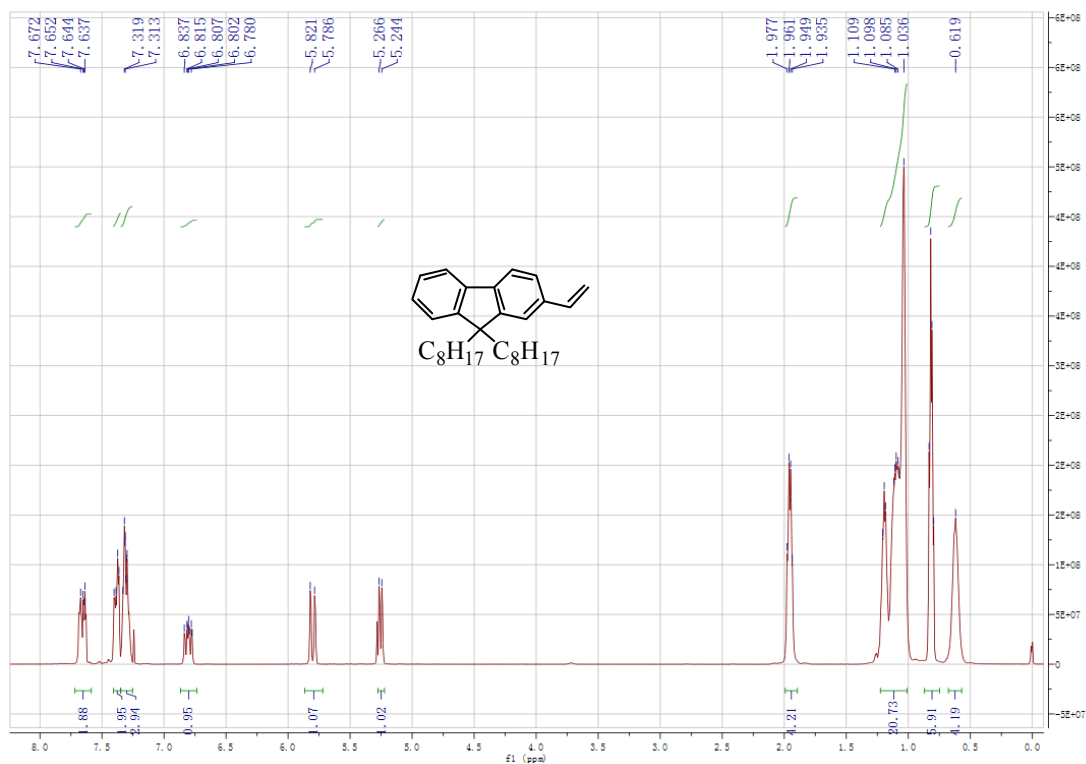

Fig. S6  $^1\text{H-NMR}$  (500 MHz) spectrum of compound E-OFV1.

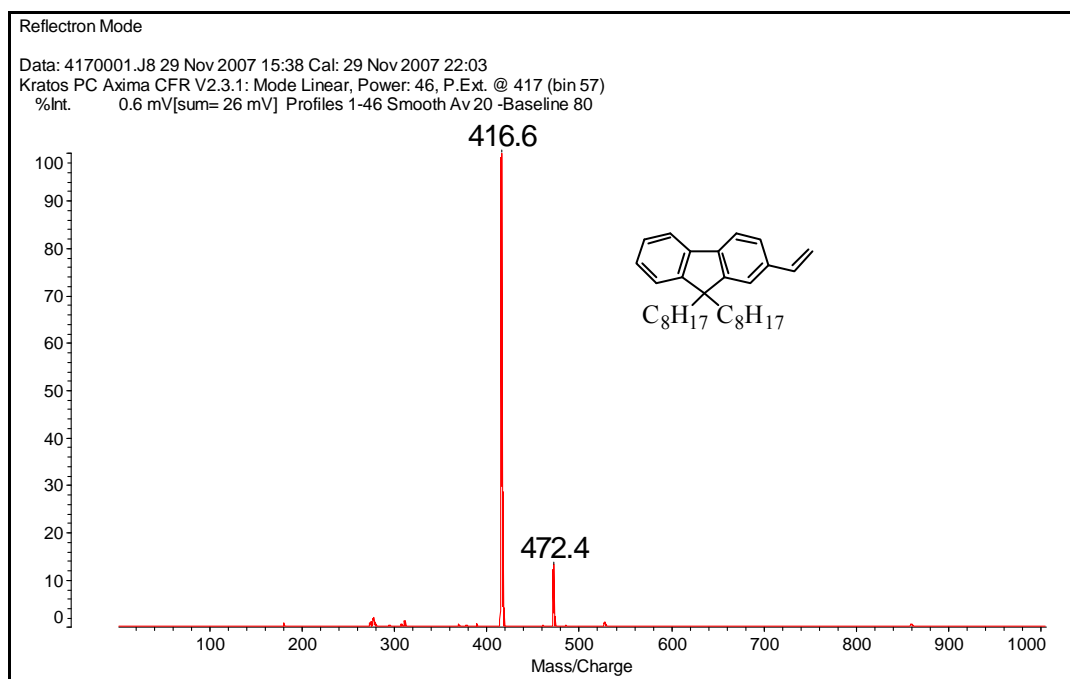

Fig. S7 MALDI/TOF MS spectrum of E-OPV1.

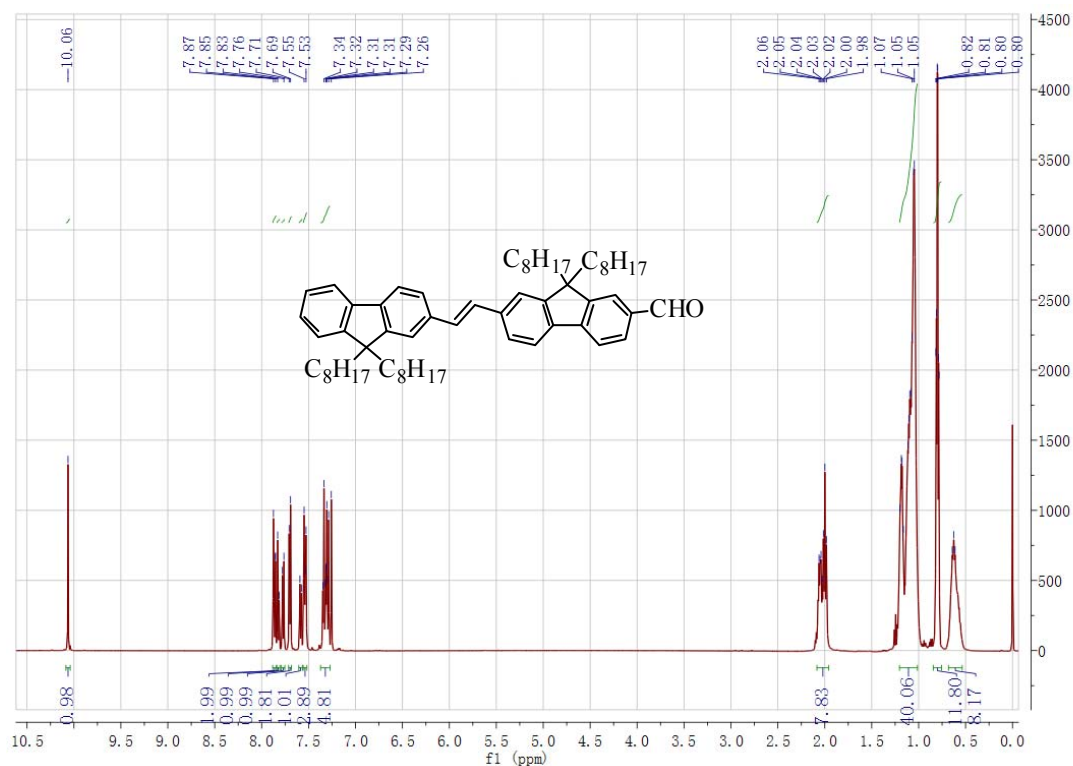

**Fig. S8** <sup>1</sup>H-NMR (500 MHz) spectrum of compound 4.

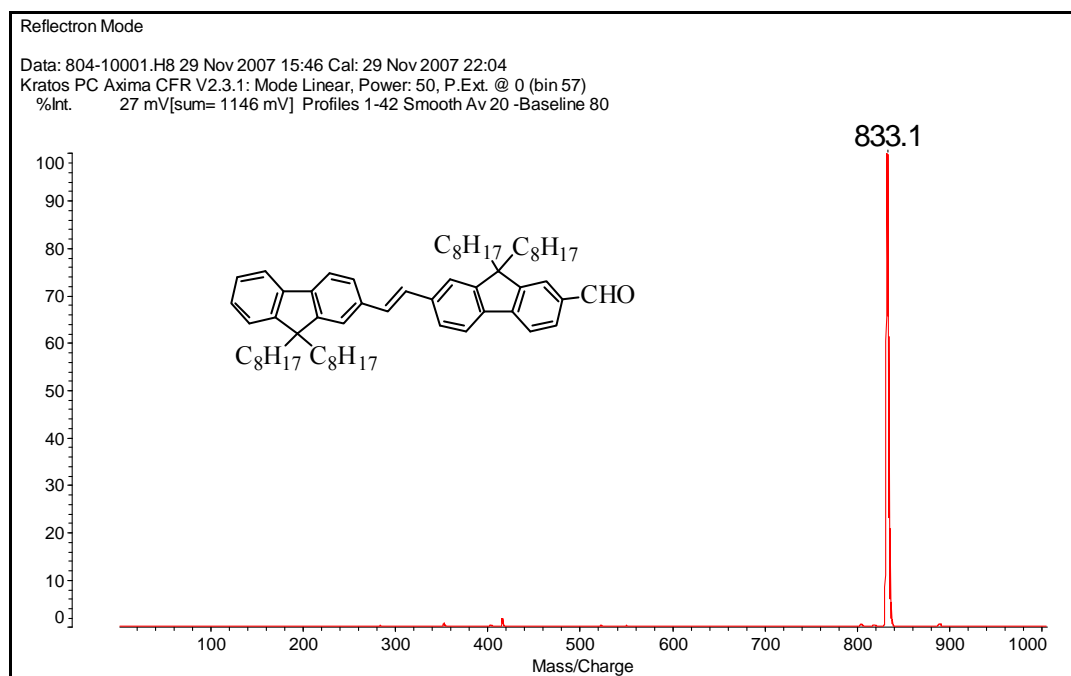

**Fig. S9** MALDI/TOF MS spectrum of compound 4.

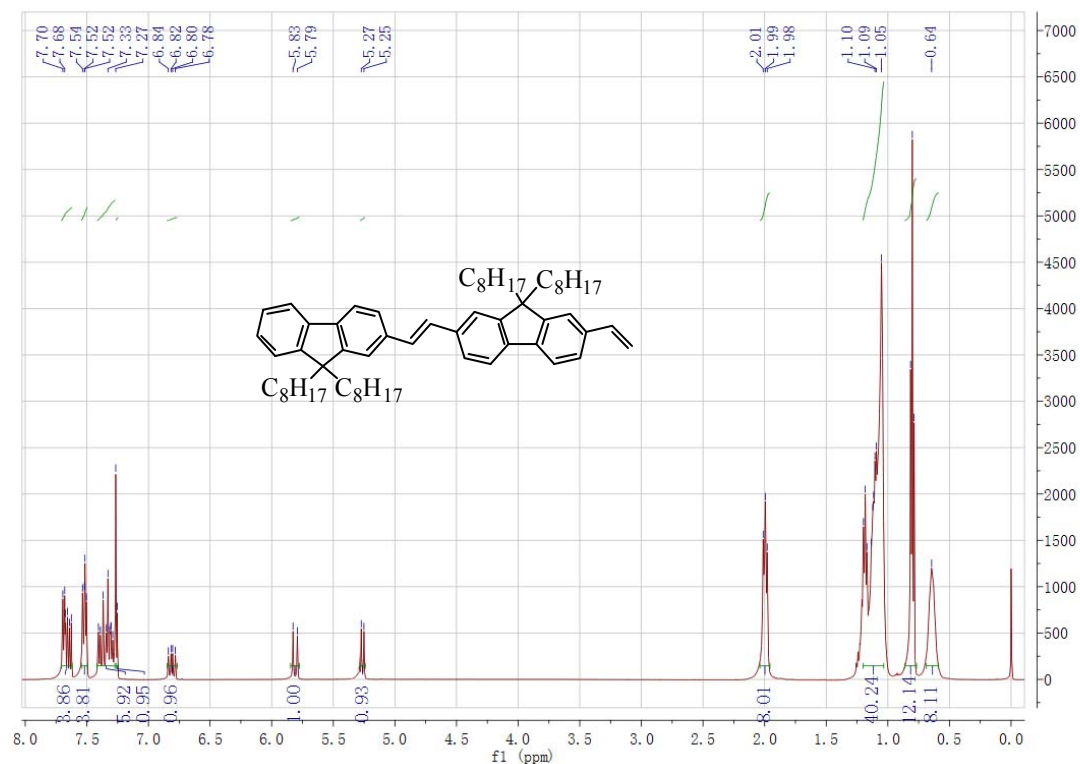

Fig. S10  $^1H$ -NMR (500 MHz) spectrum of compound E-OFV2.

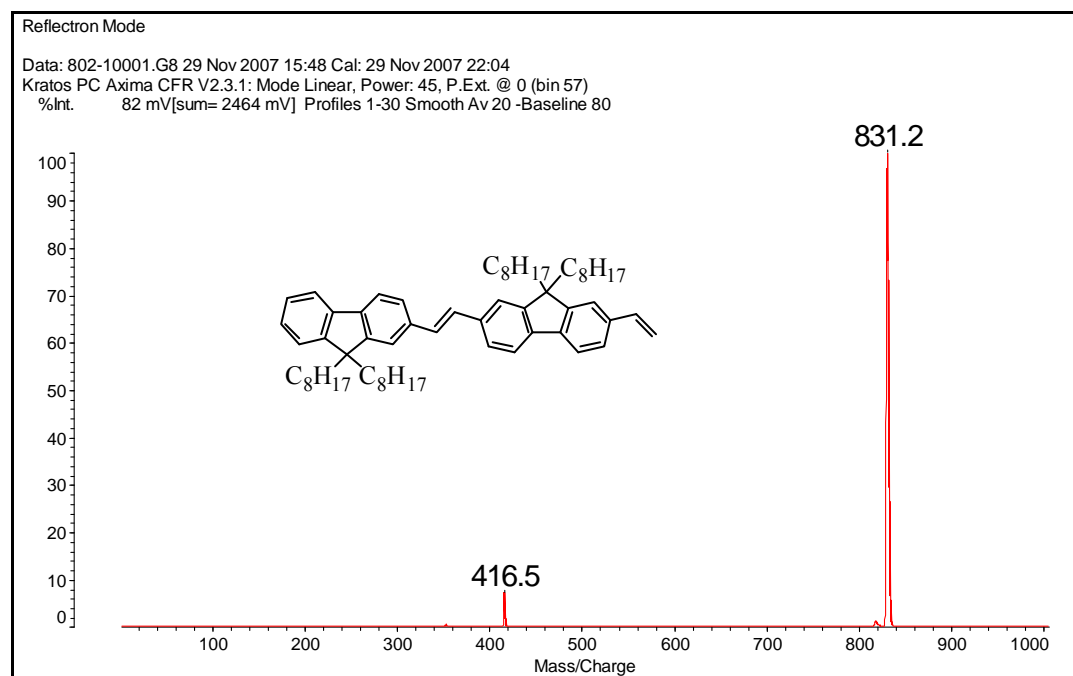

Fig. S11 MALDI/TOF MS spectrum of E-OFV2.

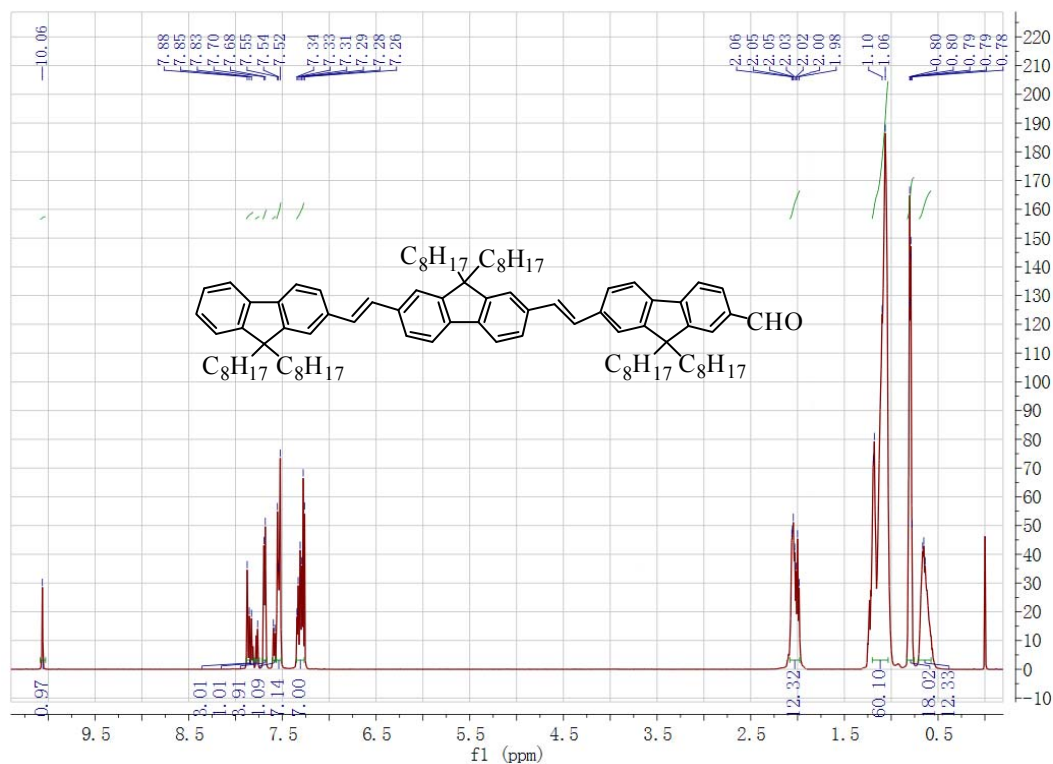

**Fig. S12** <sup>1</sup>H-NMR (500 MHz) spectrum of compound **5**.

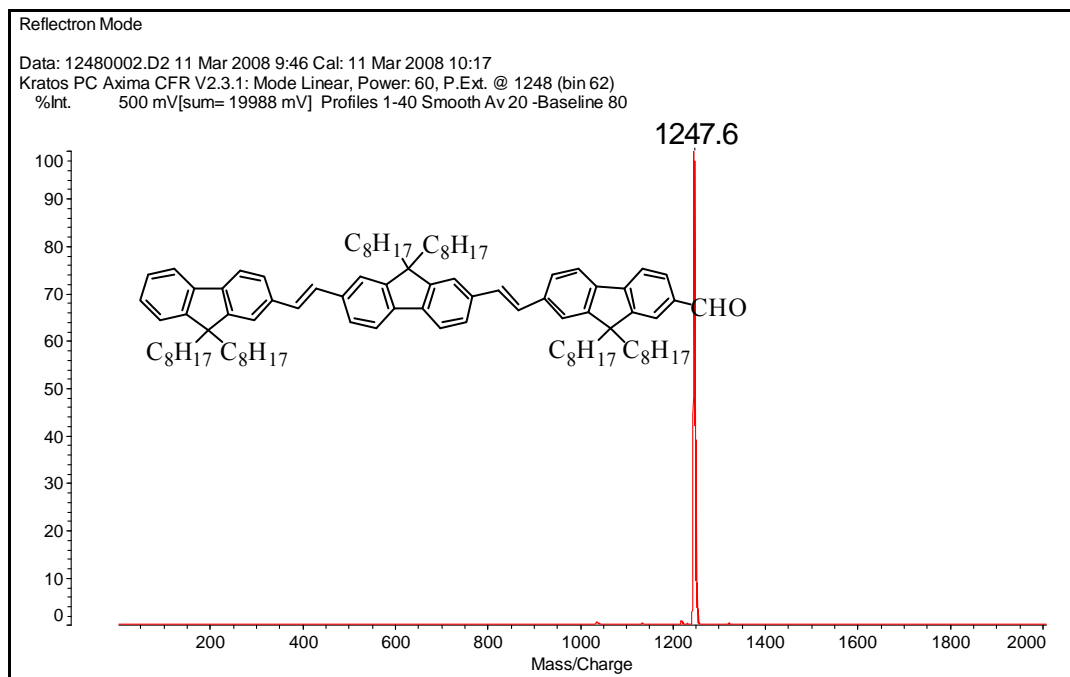

**Fig. S13** MALDI/TOF MS spectrum of **5**.



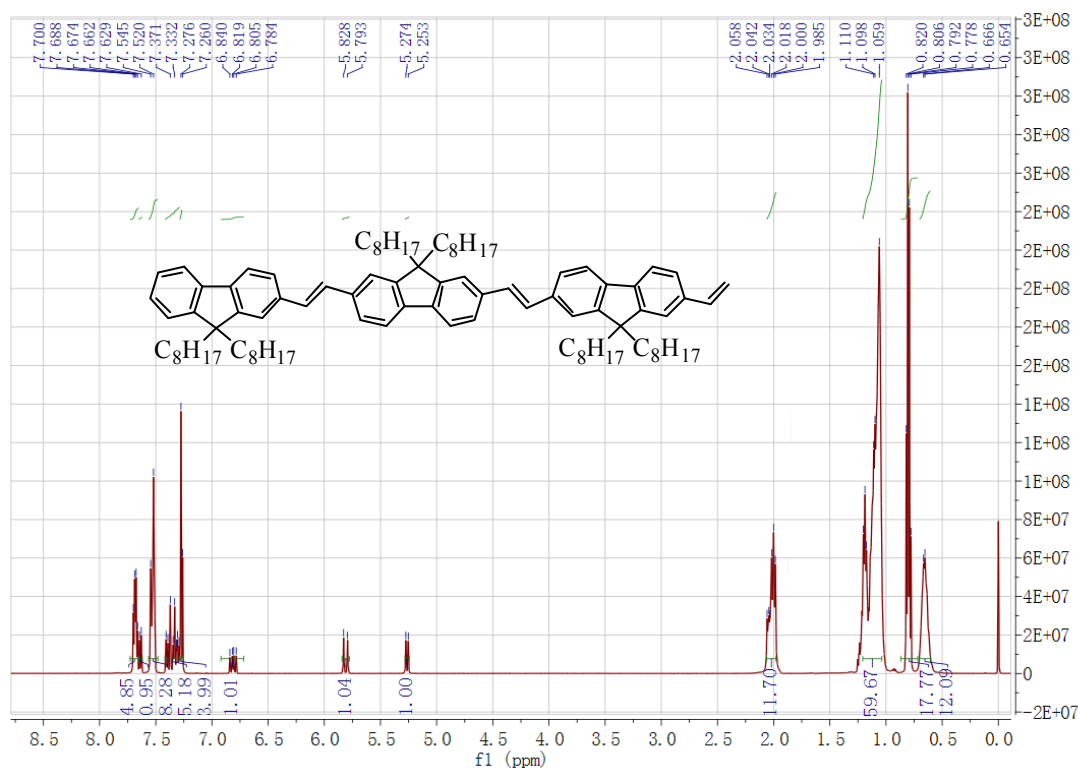

Fig. S14  $^1H$ -NMR (500 MHz) spectrum of compound E-OFV3.

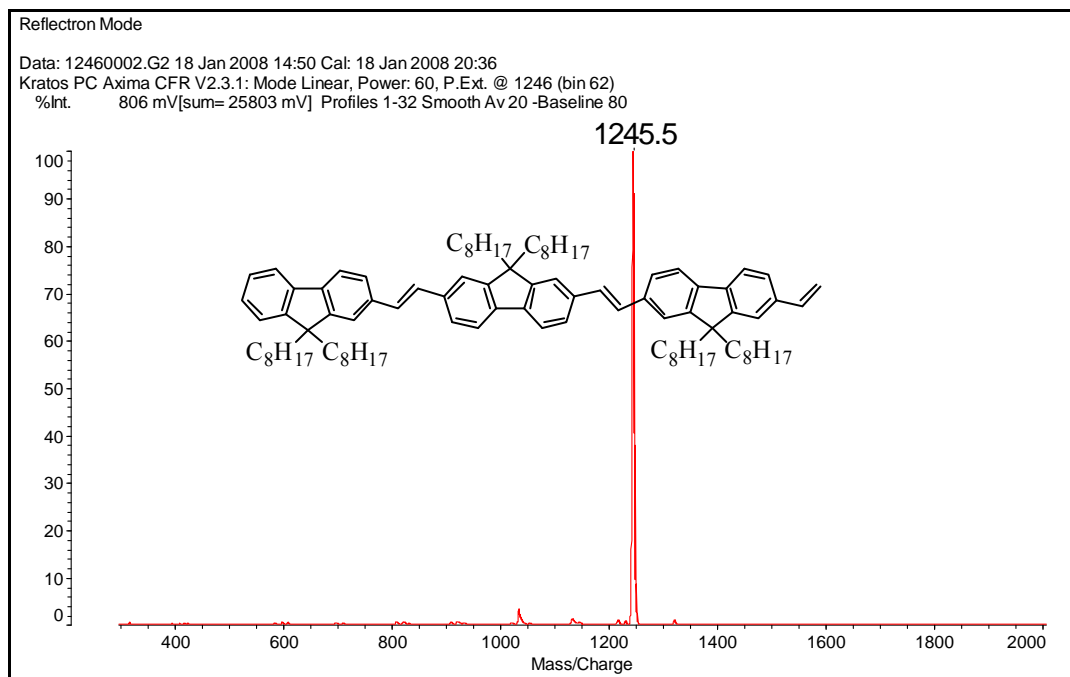

Fig. S15 MALDI/TOF MS spectrum of E-OFV3.

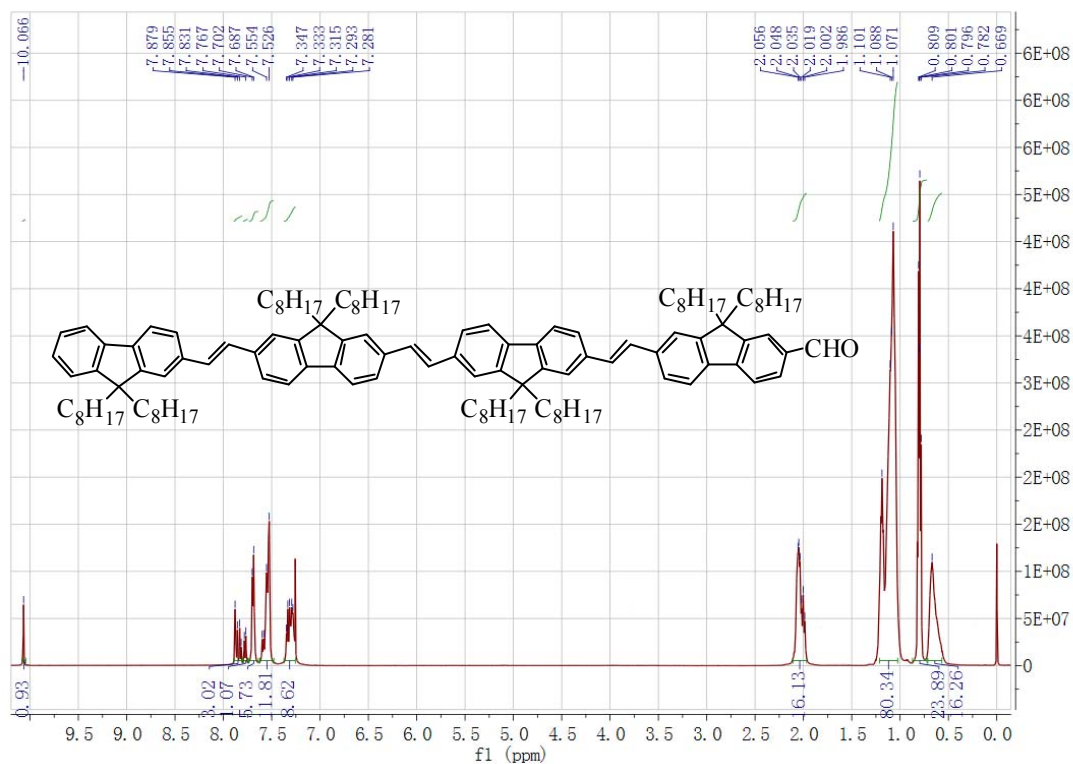

**Fig. S16**  $^1\text{H-NMR}$  (500 MHz) spectrum of compound 6.

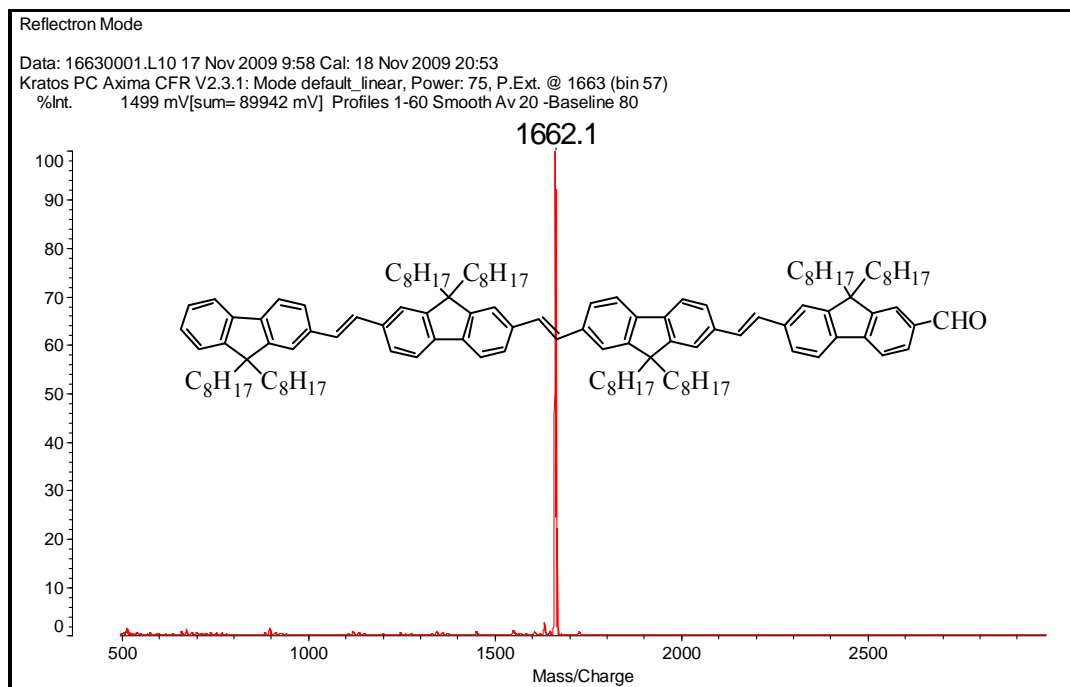

**Fig. S17** MALDI/TOF MS spectrum of 6.

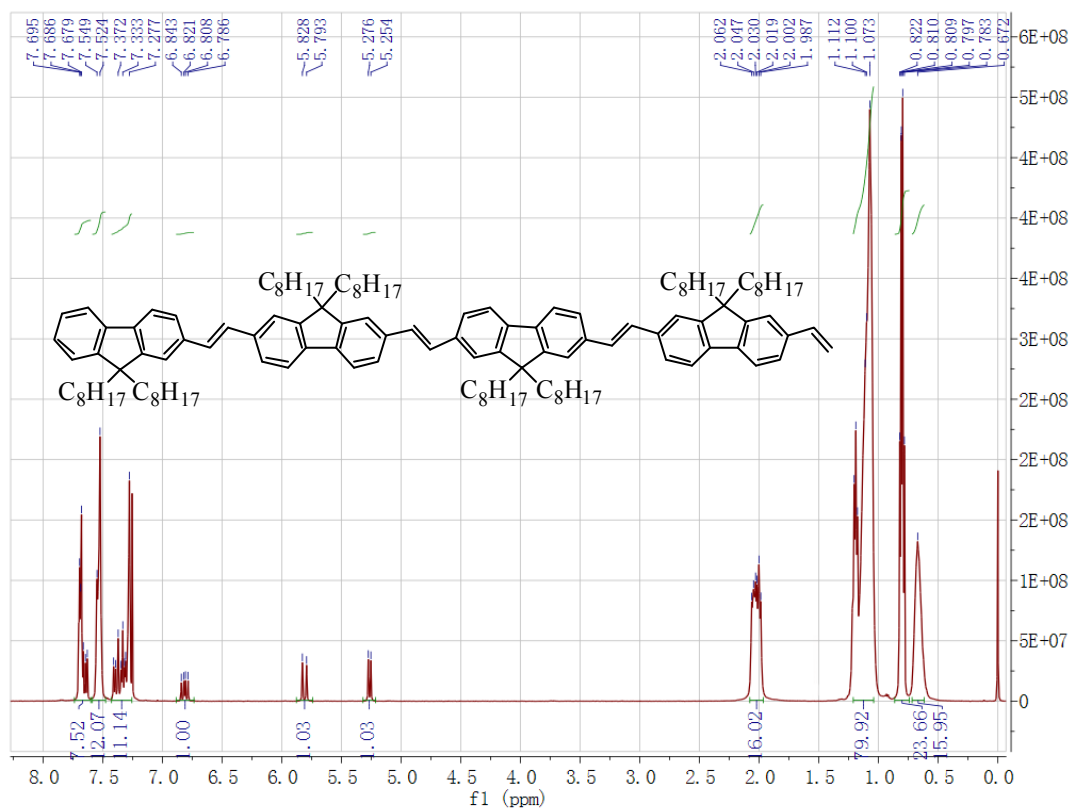

Fig. S18  $^1H$ -NMR (500 MHz) spectrum of compound E-OFV4.

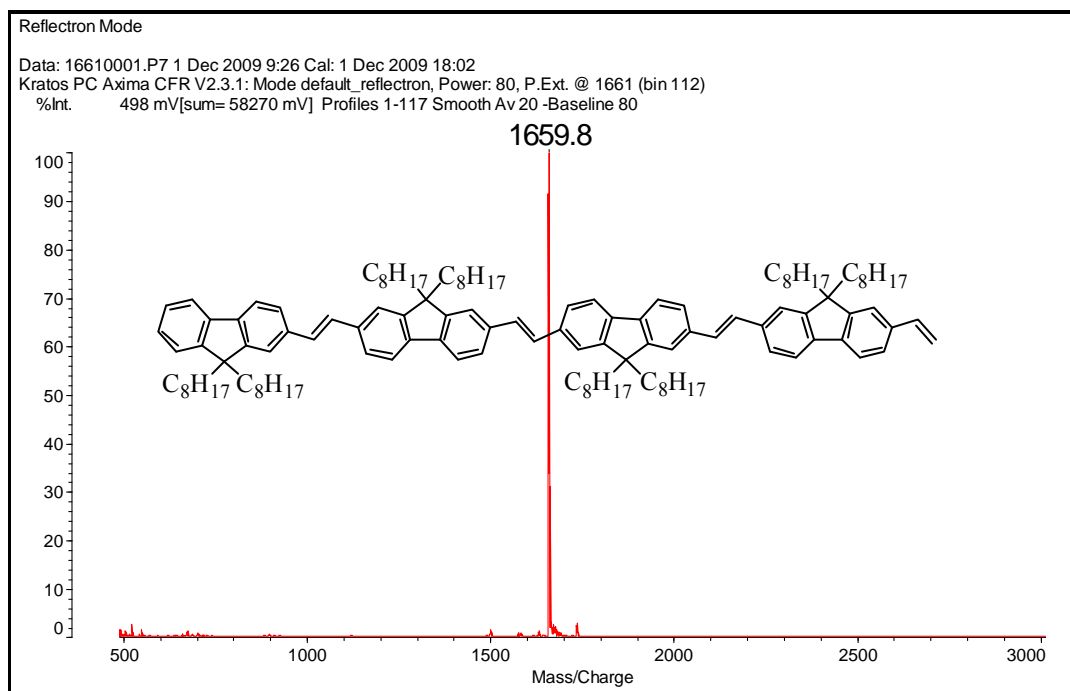

Fig. S19 MALDI/TOF MS spectrum of E-OFV4.

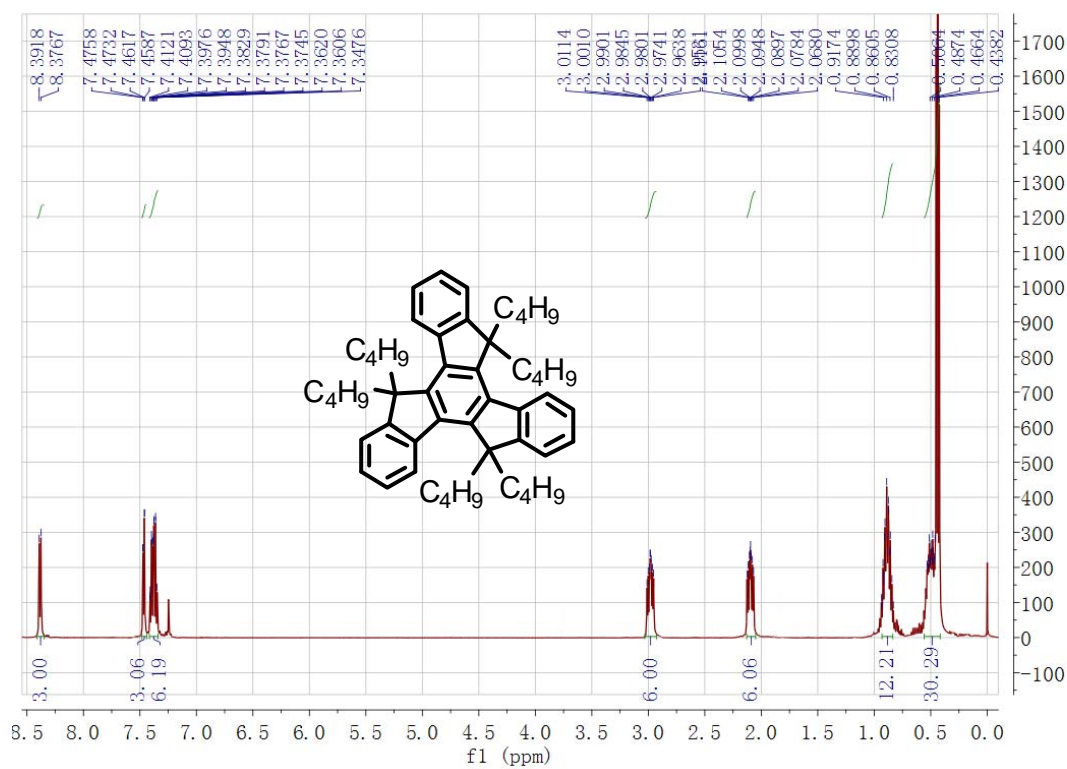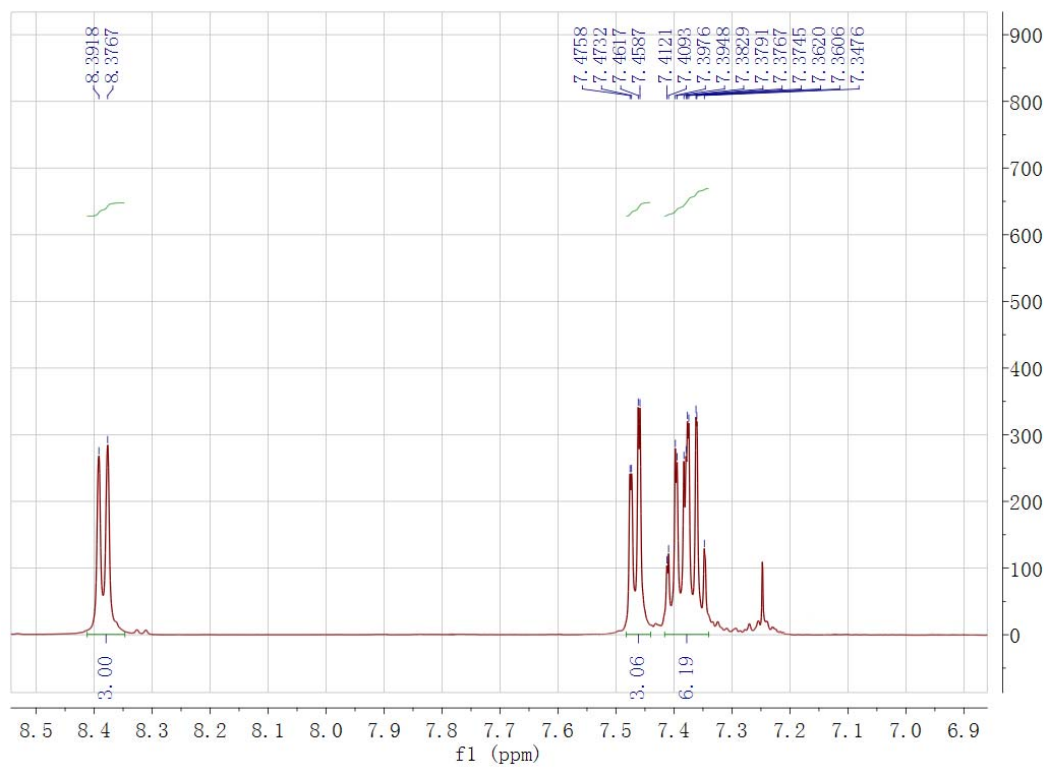

**Fig. S20**  $^1\text{H-NMR}$  (500 MHz) spectra of compound **8**.

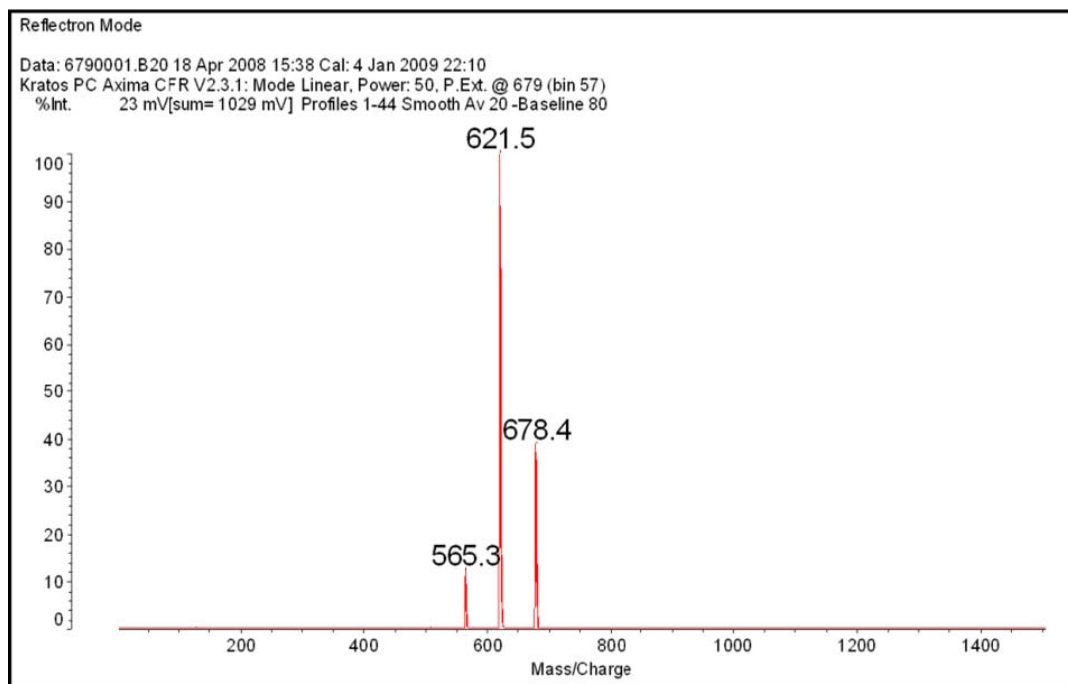

**Fig. S21** MALDI/TOF MS spectrum of compound **8**.

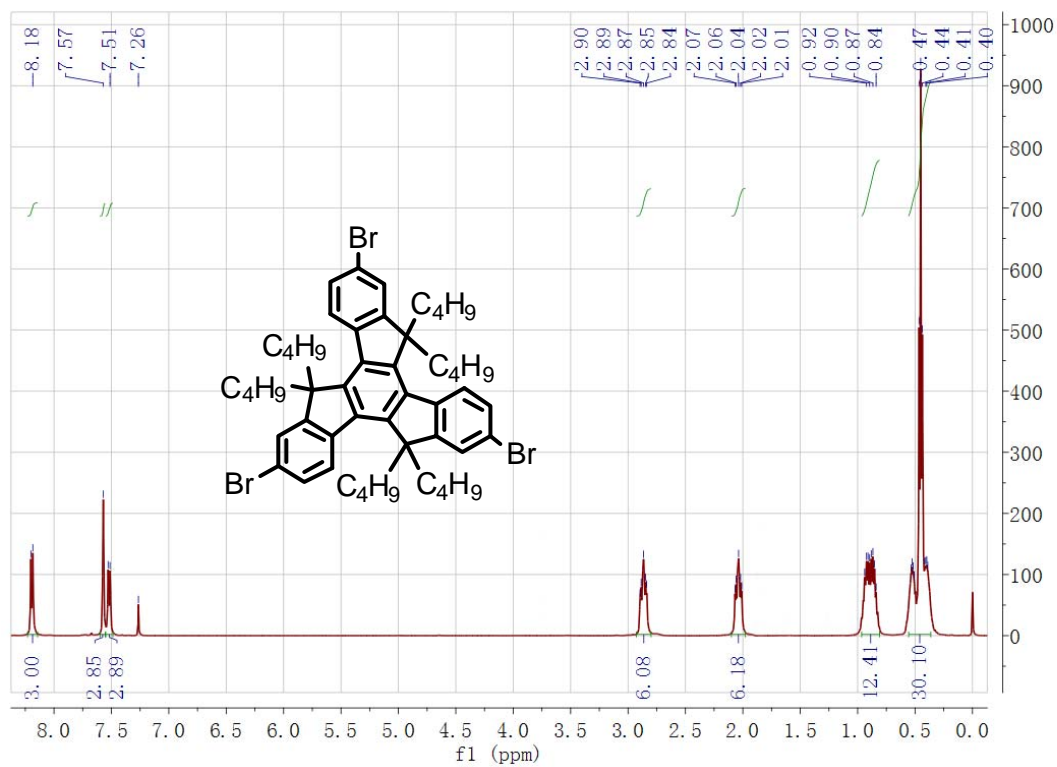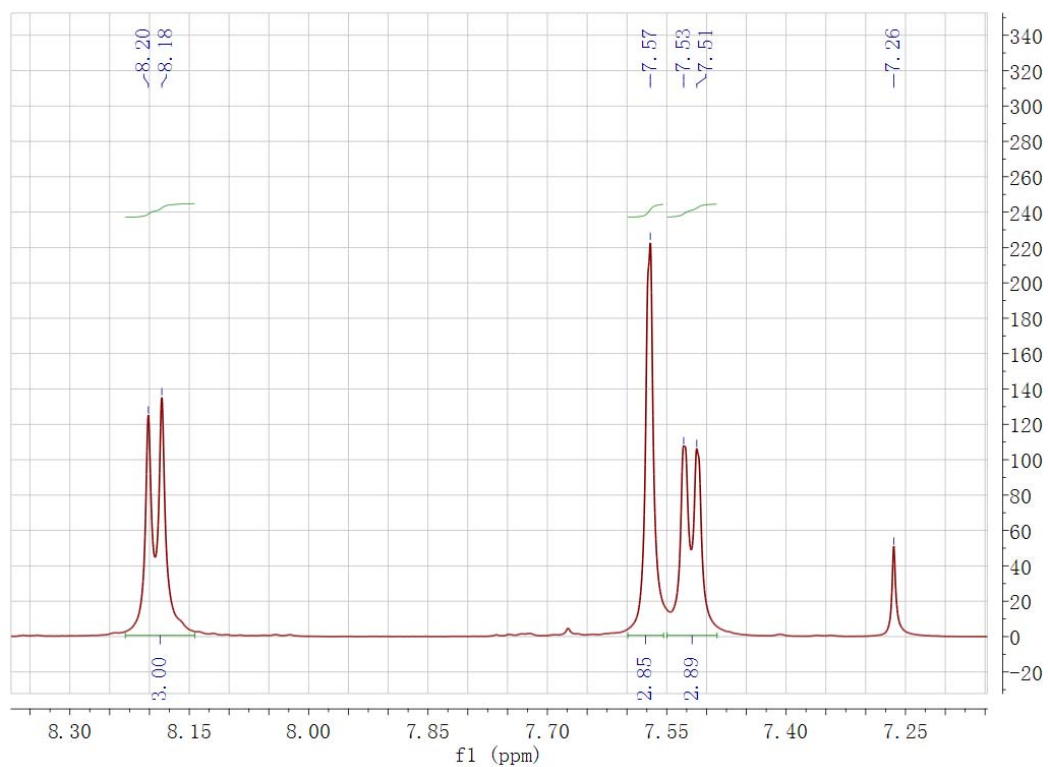

Fig. S22  $^1\text{H-NMR}$  (500 MHz) spectrum of compound 9.

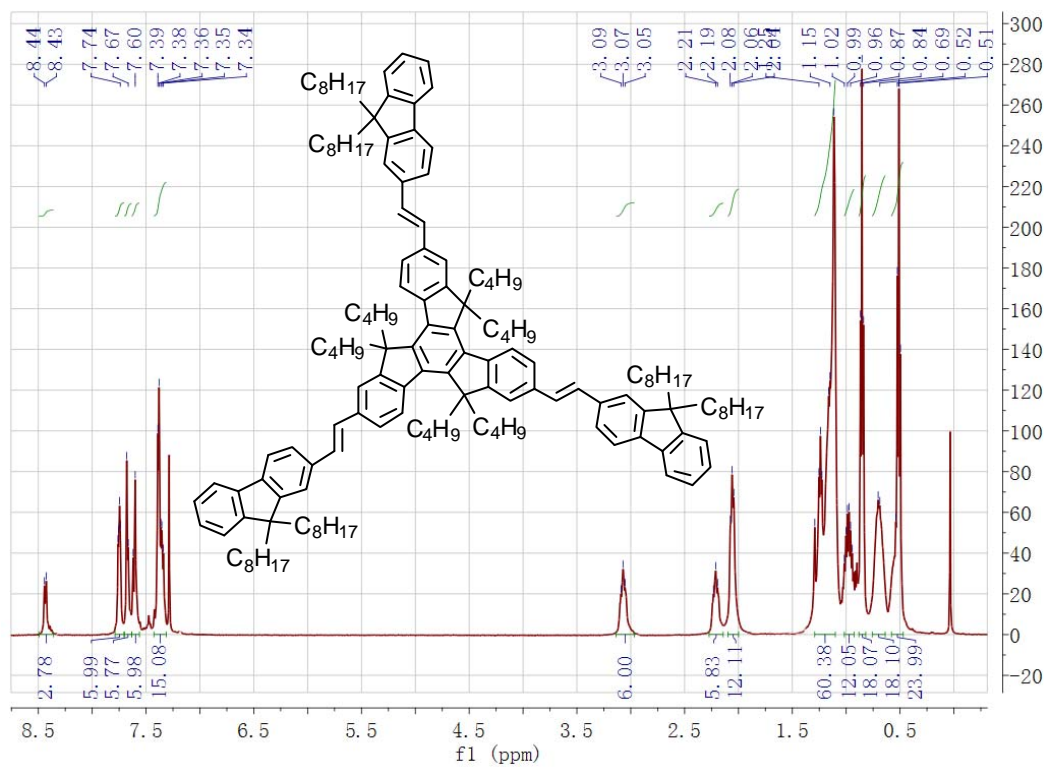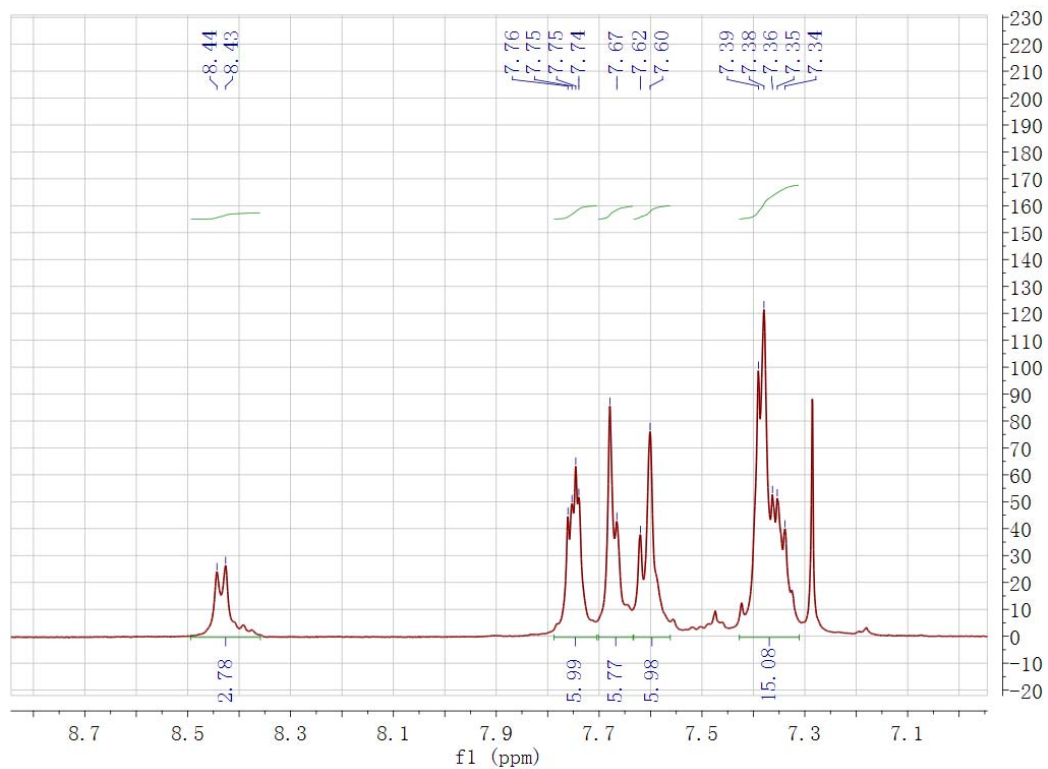

**Fig. S23** <sup>1</sup>H-NMR (500 MHz) spectra of Tr-OFV1.

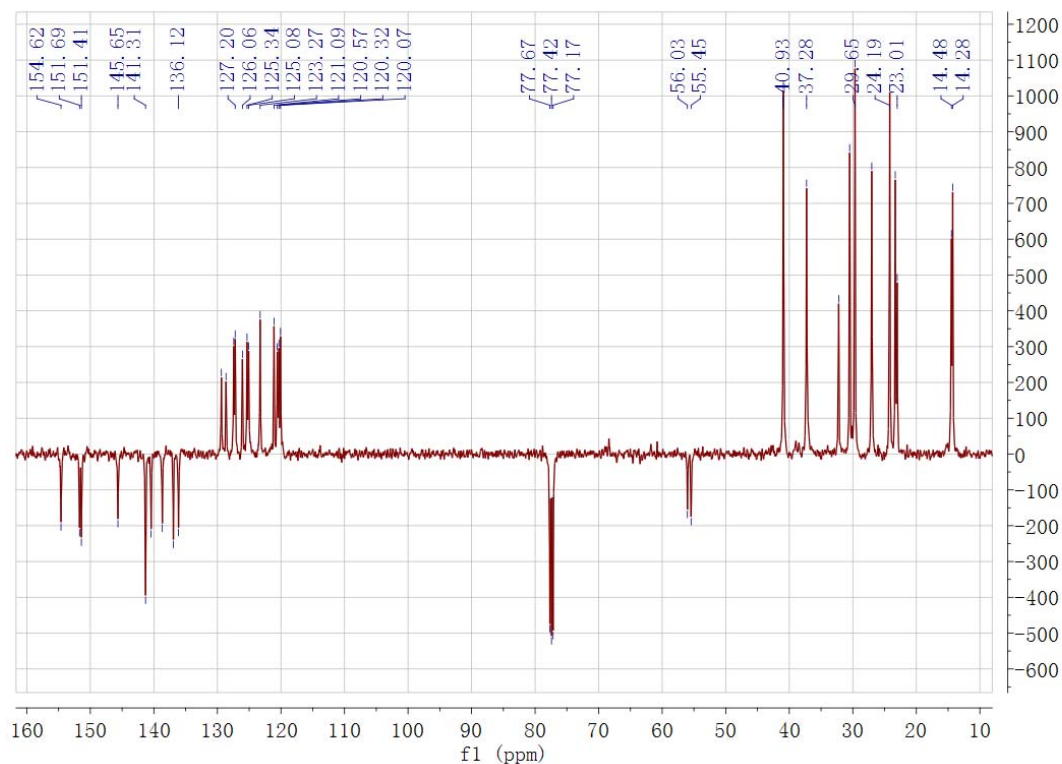

**Fig. S24**  $^{13}\text{C}$  NMR (125 MHz) spectrum of **Tr-OFV1**.

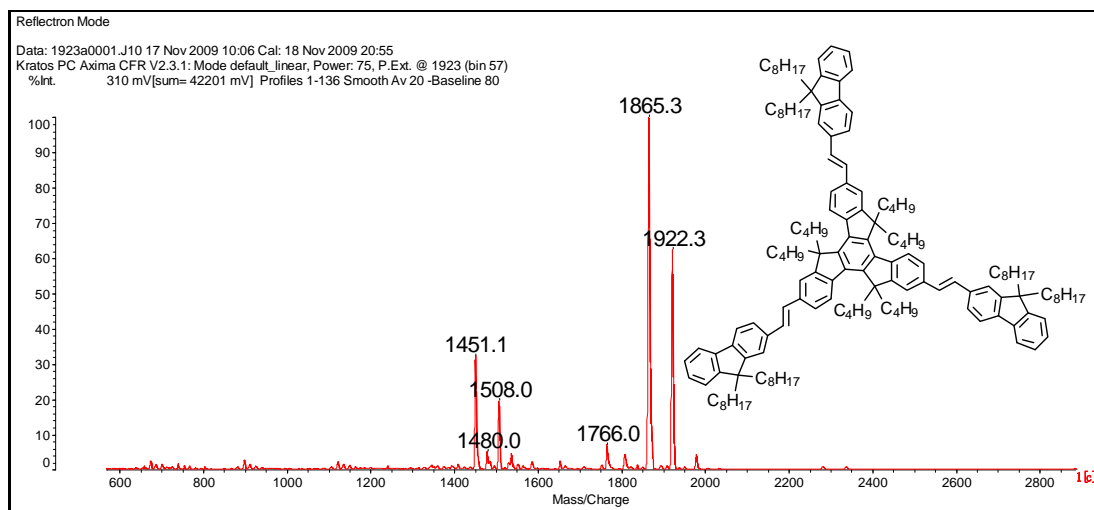

**Fig. S25** MALDI/TOF MS spectrum of **Tr-OFV1**.



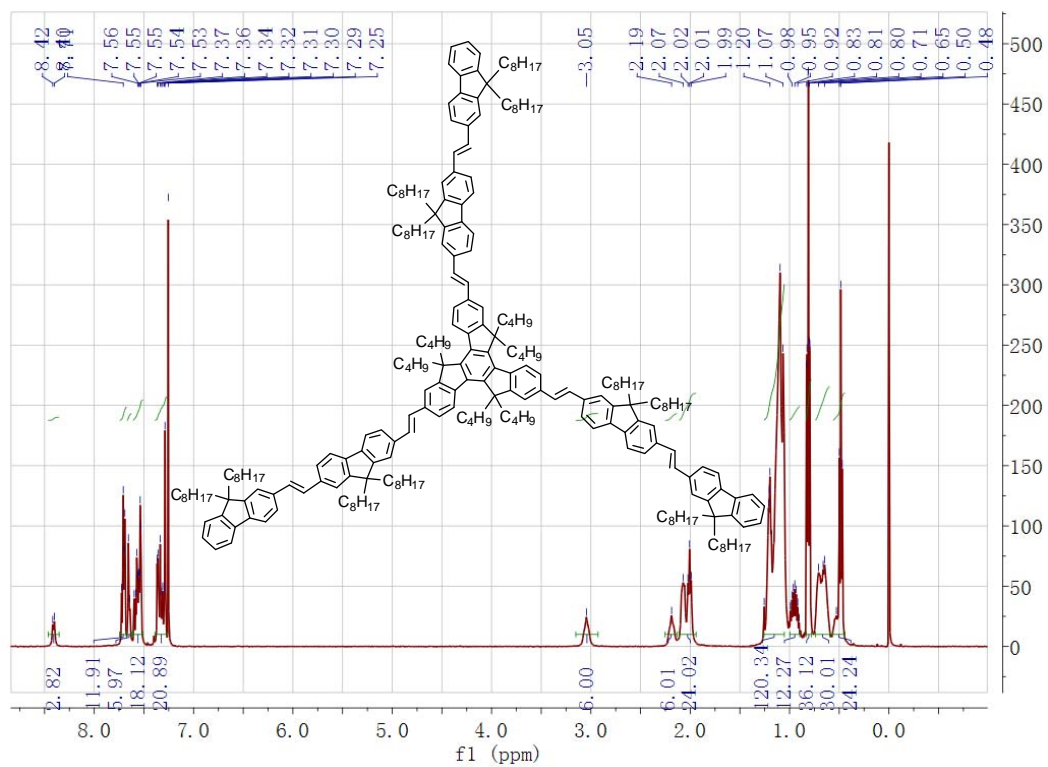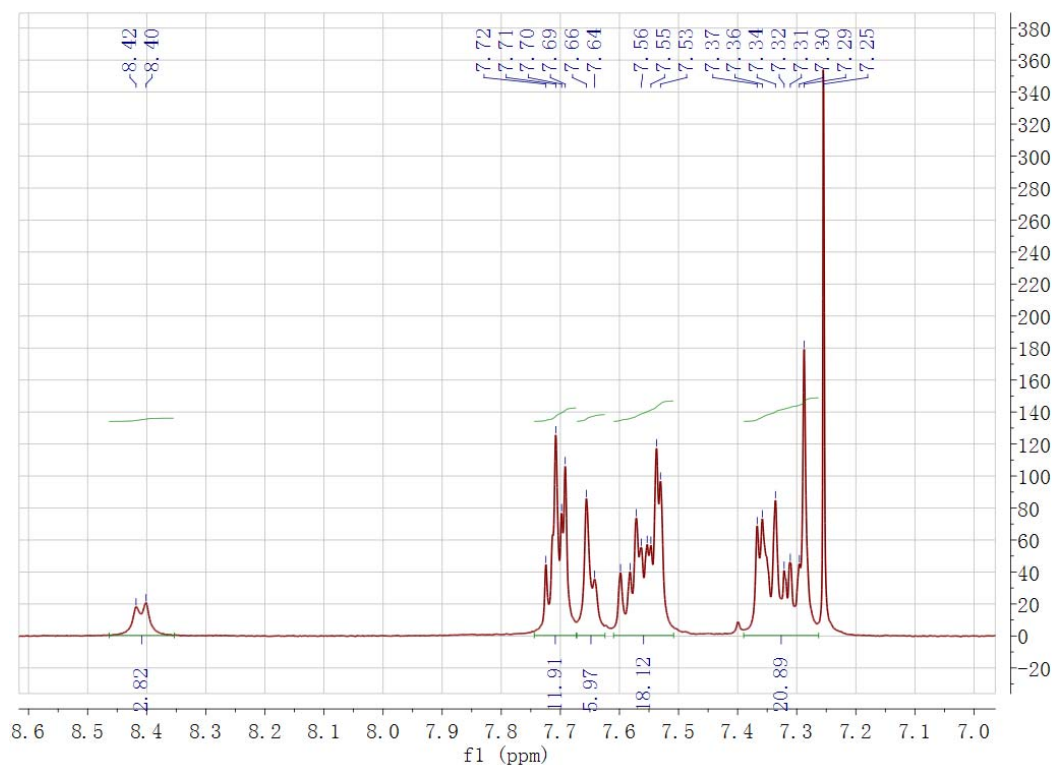

**Fig. S26** <sup>1</sup>H-NMR (500 MHz) spectrum of **Tr-OFV2**.

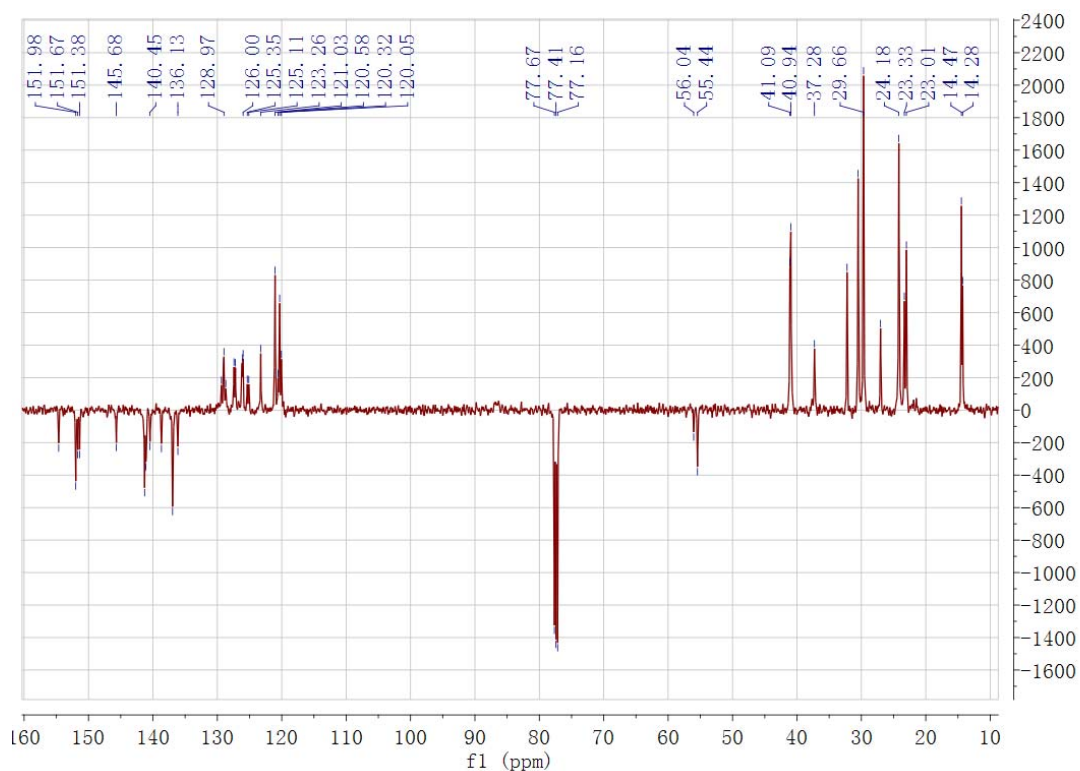

Fig. S27  $^{13}\text{C}$ -NMR (125 MHz) spectrum of Tr-OFV2.

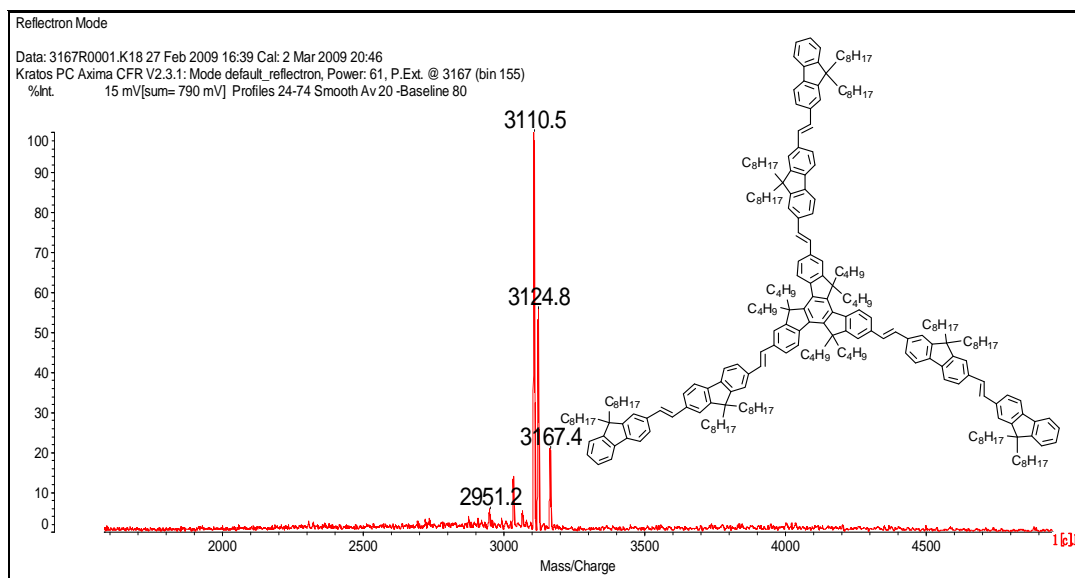

Fig. S28 MALDI/TOF MS spectrum of Tr-OFV2.

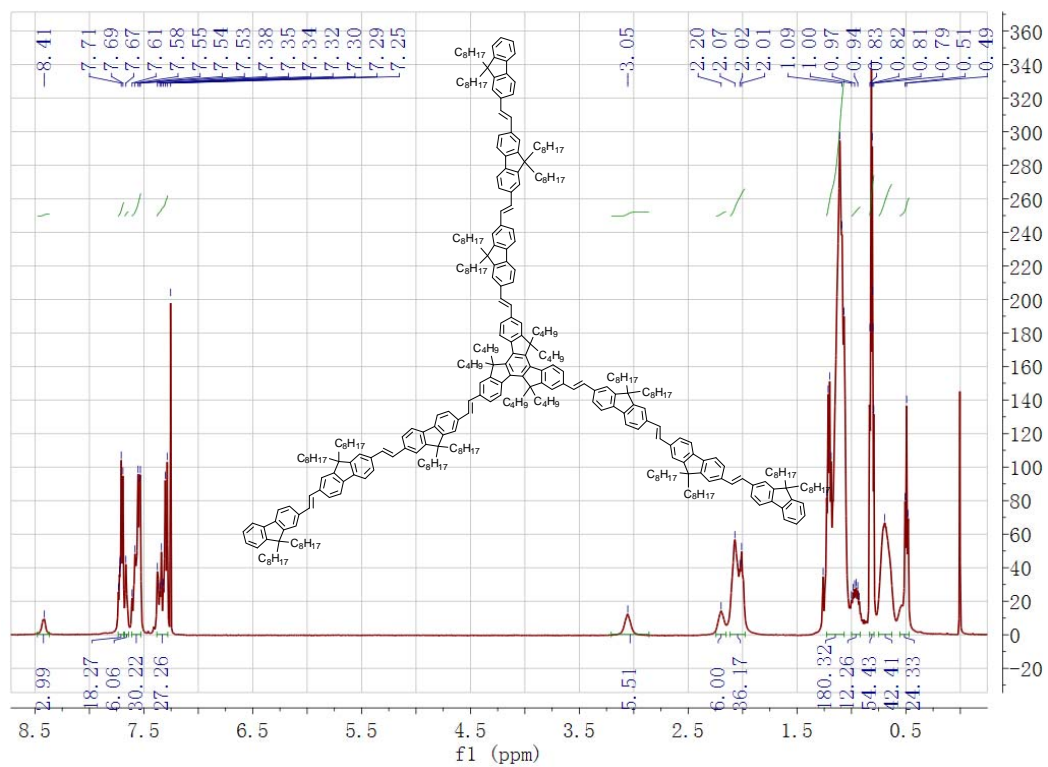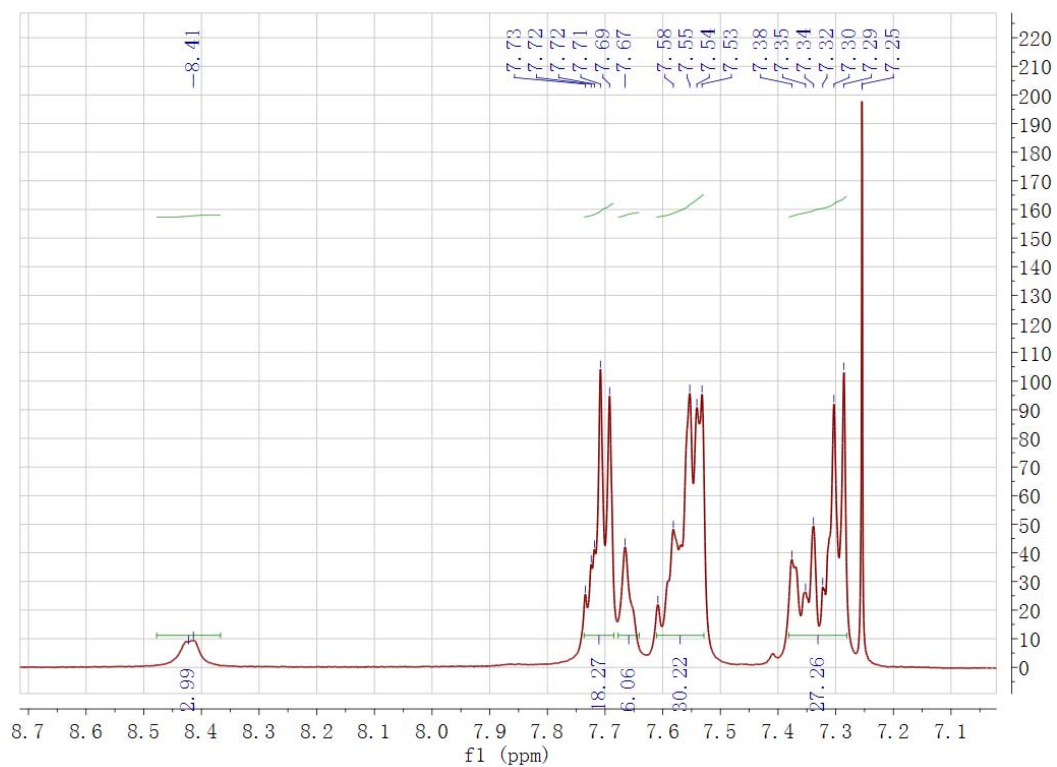

**Fig. S29** <sup>1</sup>H-NMR (500 MHz) spectra of Tr-OV3.

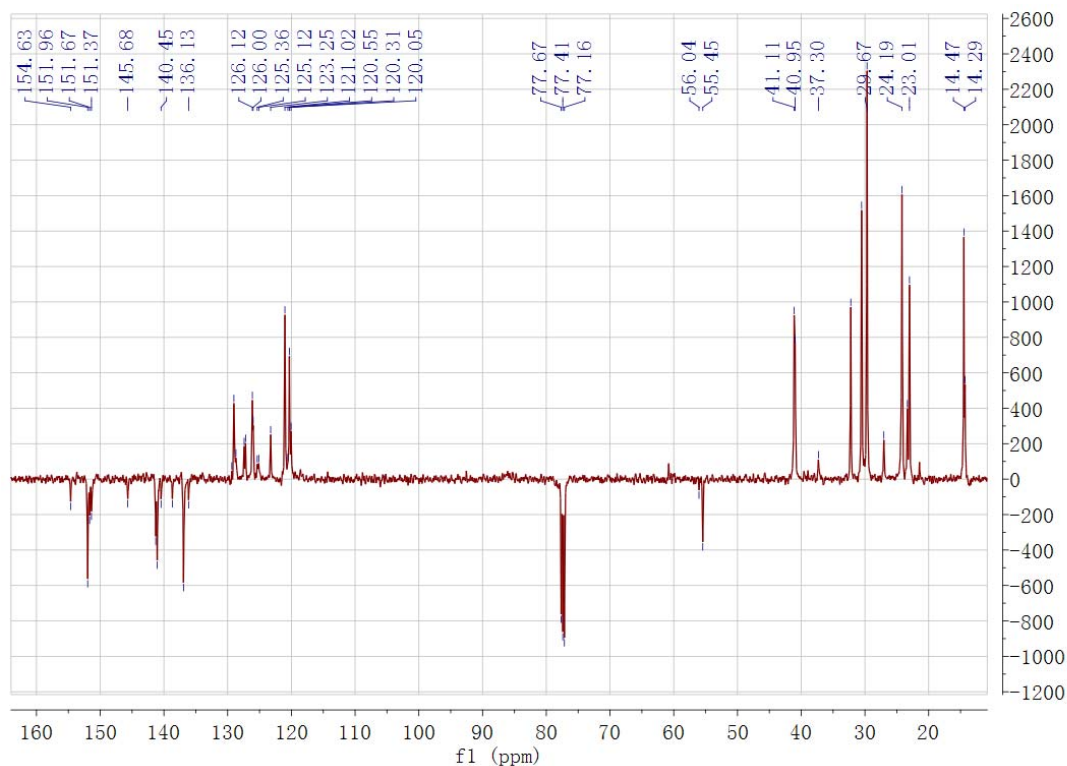

Fig. S30  $^{13}\text{C}$ -NMR (125 MHz) spectrum of Tr-OFV3.

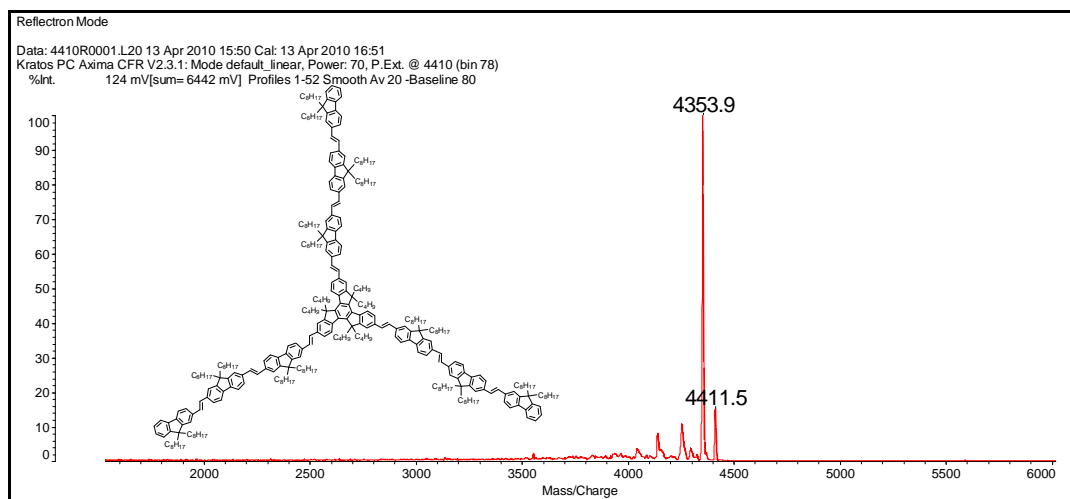

Fig. S31 MALDI/TOF MS spectrum of Tr-OFV3.

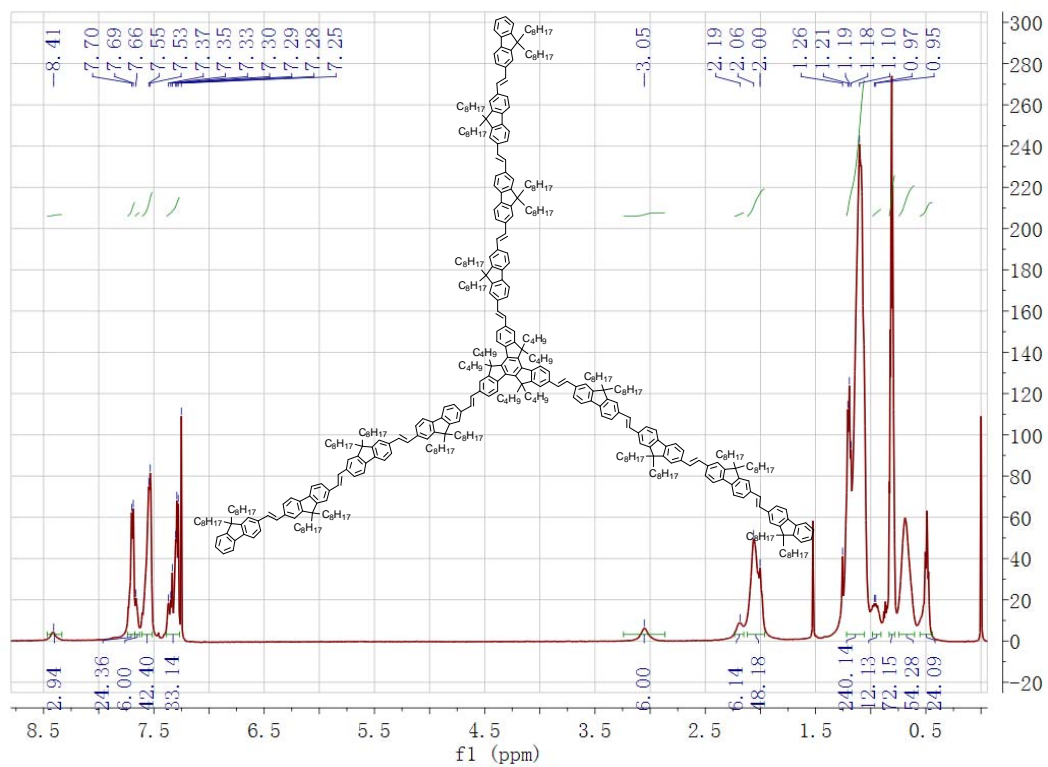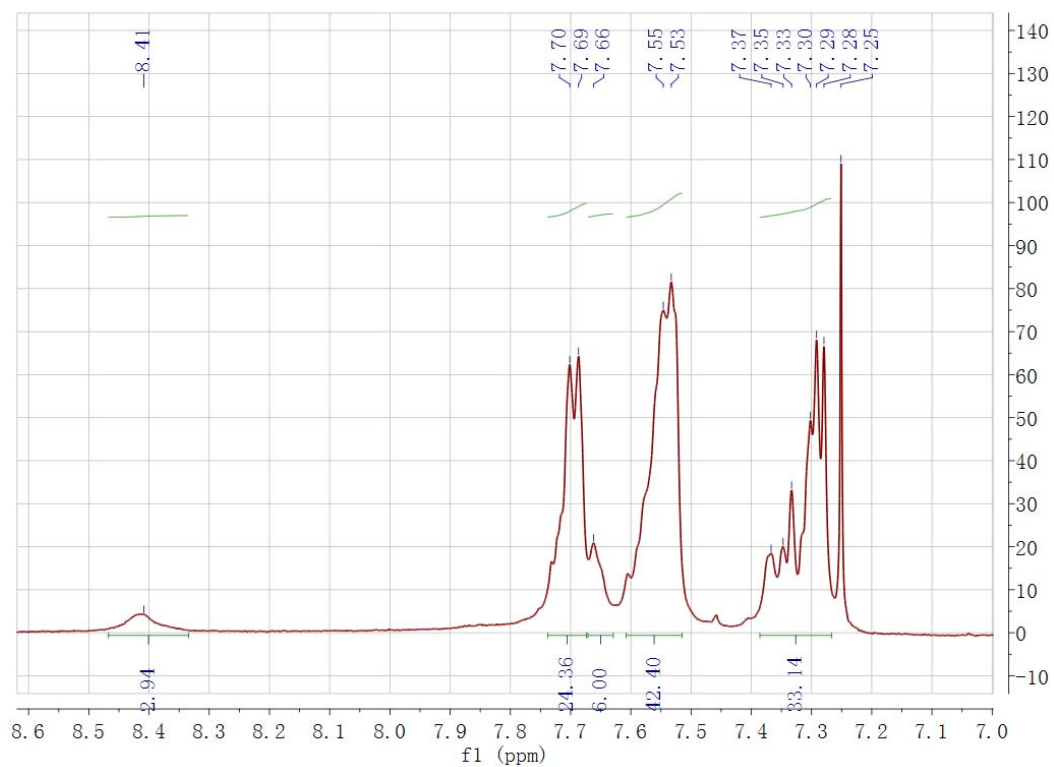

**Fig. S32** <sup>1</sup>H-NMR (500 MHz) spectra of Tr-OFV4.

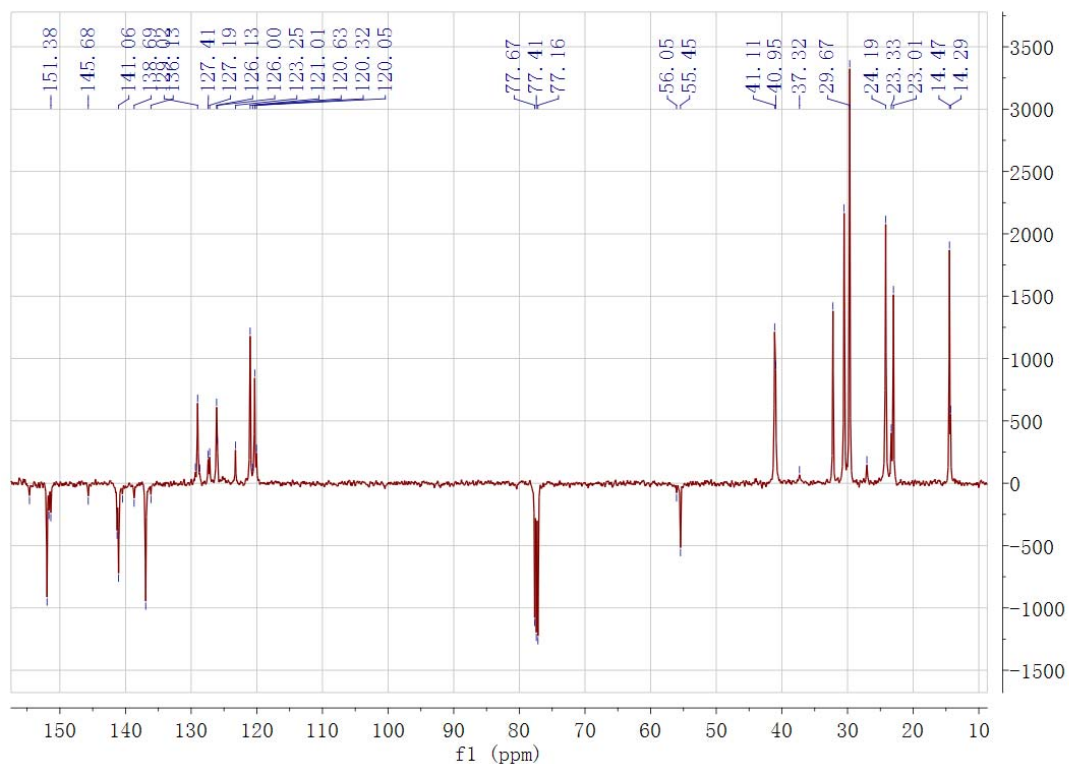

Fig. S33  $^{13}\text{C}$ -NMR (125 MHz) spectrum of compound **Tr-OFV4**.

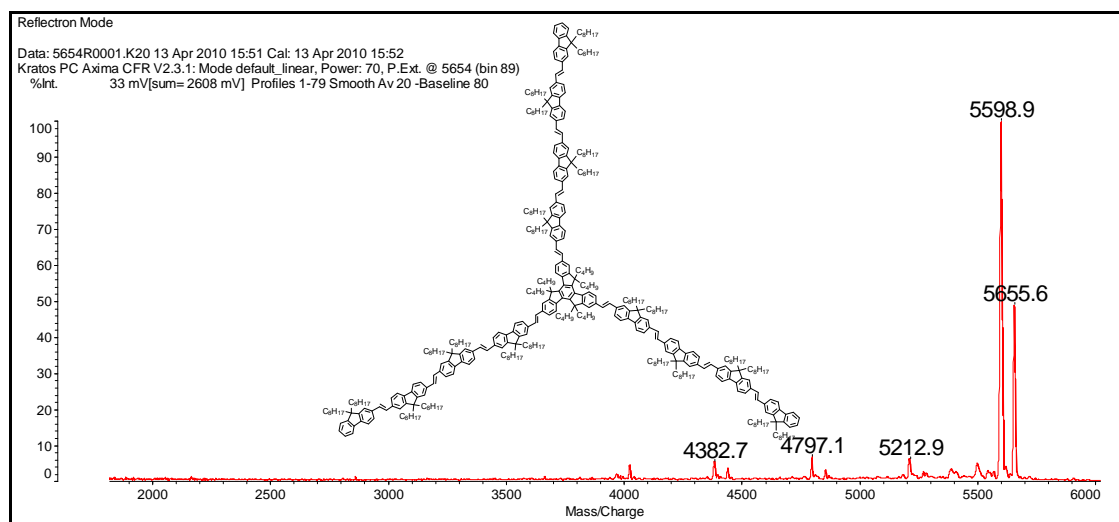

Fig. S34 MALDI/TOF MS spectrum of **Tr-OFV4**.
